# Supplementary material for: A new FRET-based ratiometric probe for fluorescence and colorimetric analyses of adenosine 5′-triphosphate
Source: Royal Society of Chemistry journal article supplement (doi:10.1039/c6py02001a), 2017-01-01
Supplement: c6py02001a1.pdf [file c6py02001a1.pdf]

## Supporting Information

### **A new FERT-based ratiometric probe for fluorescent and colorimetric analyses of adenosine 5'-triphosphate**

Nianqi An, Qiang Zhang, Jing Wang, Cui Liu, Luqing Shi, Lihua Liu,  
Ludi Deng and Yan Lu\*

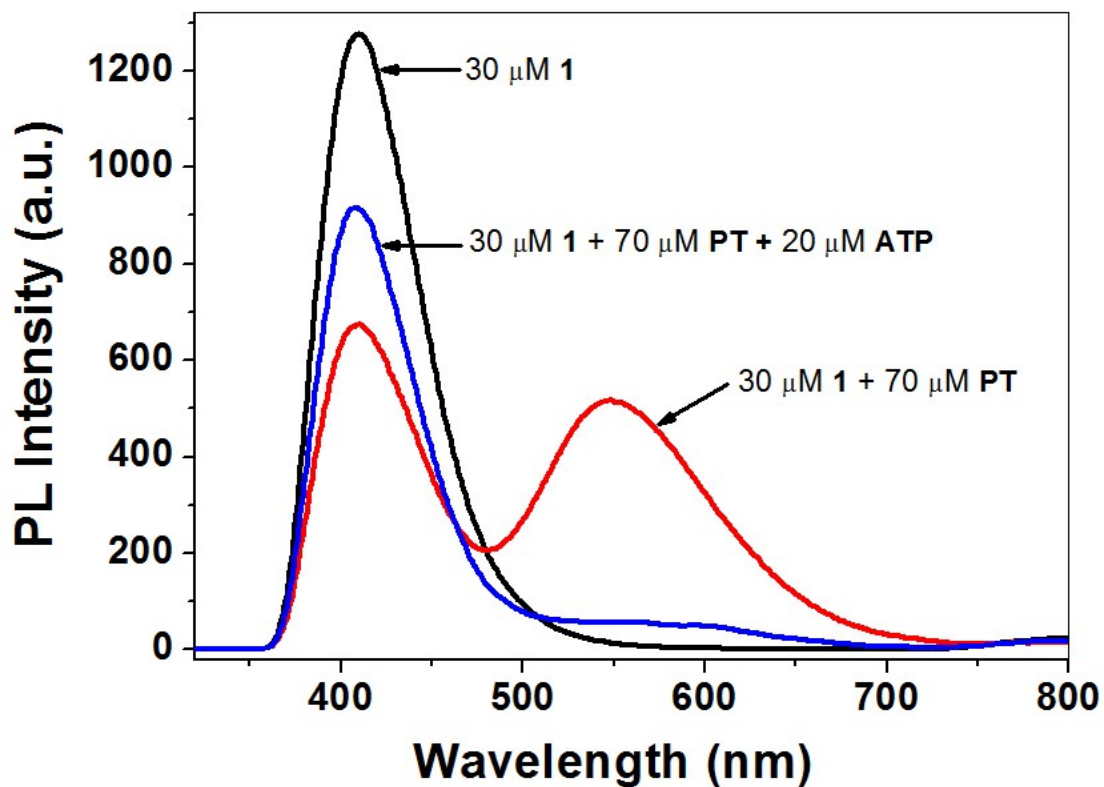

Fig. S1: Fluorescent spectra of compound 1, the mixed solution of PT and 1 in absence and presence of ATP in water (excited at 300 nm).

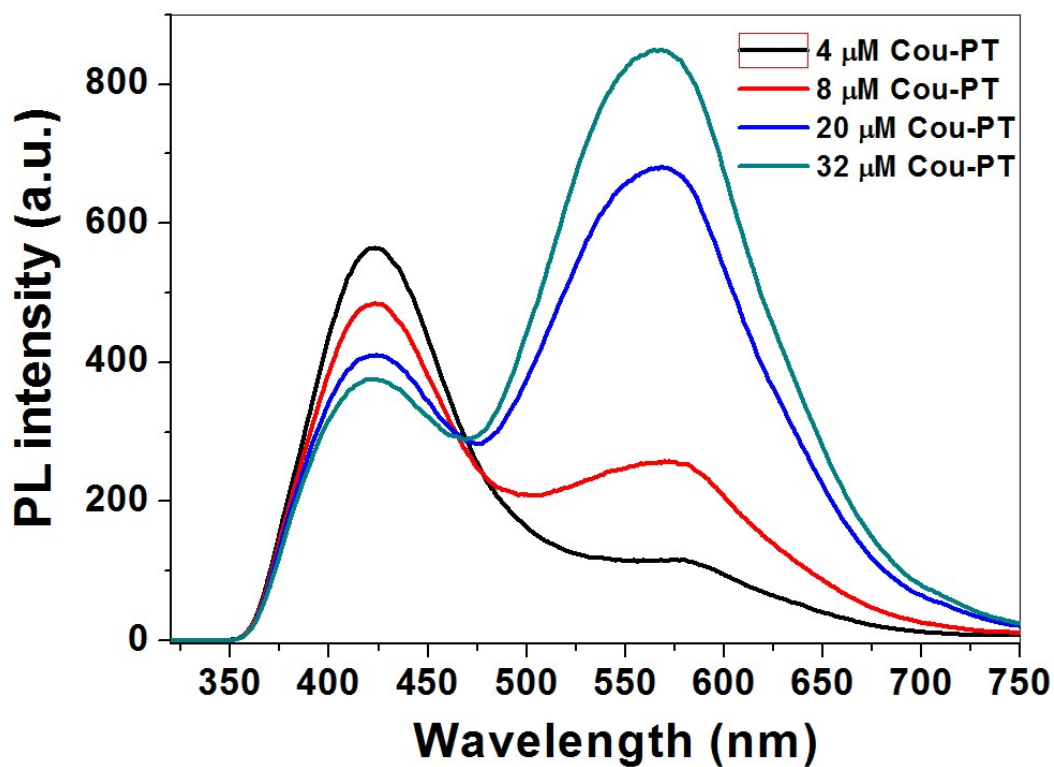

Fig. S2: Photoluminescent emission spectra of Cou-PT with various concentrations in water (excited at 300 nm).

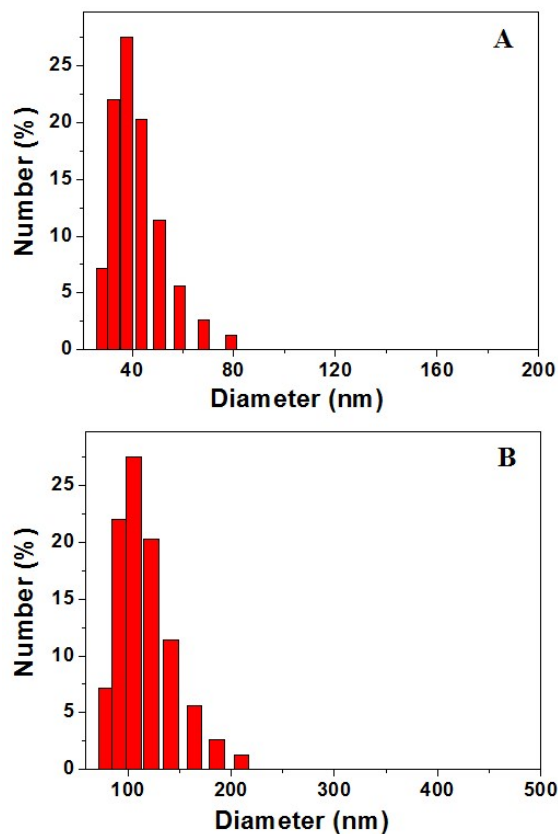

**Fig. S3:** Hydrodynamic diameter distribution of **Cou-PT** (A) and **Cou-PT/ATP** complex (B) in water. [Cou-PT] = 100  $\mu$ M, [ATP] = 30  $\mu$ M.

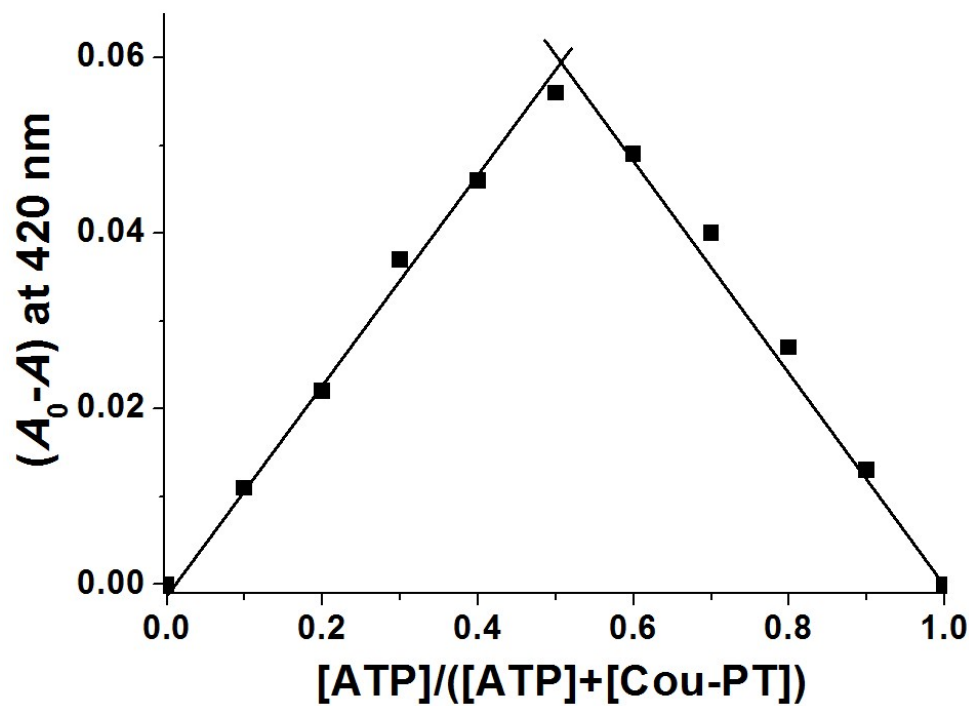

**Fig. S4:** Job's plot.

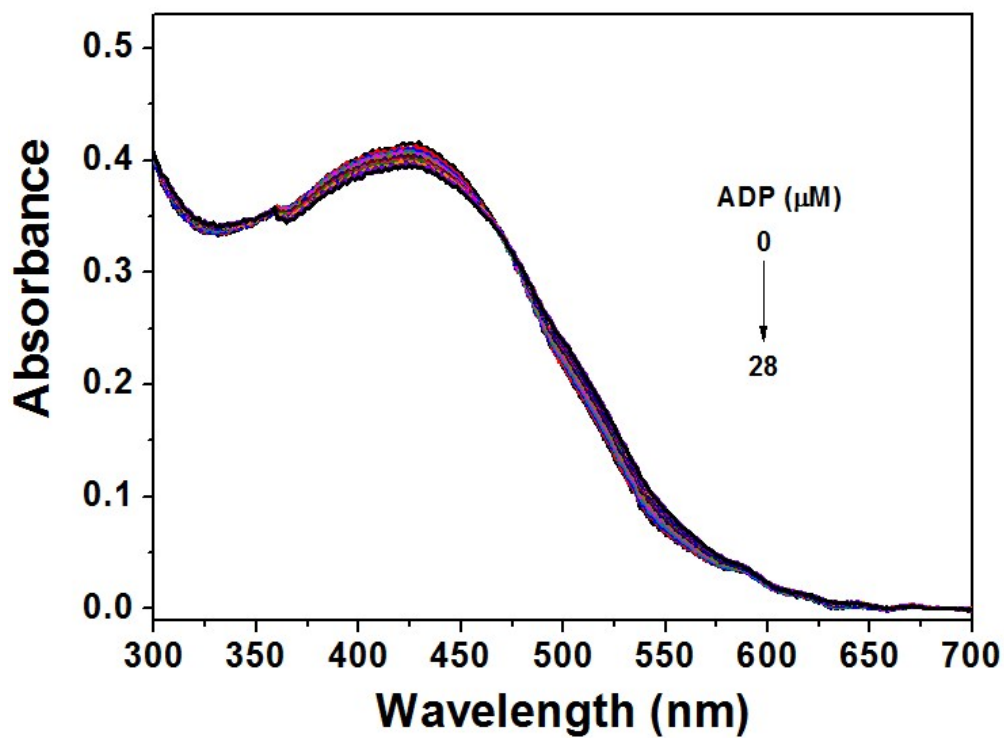

**Fig. S5:** Absorption spectra of **Cou-PT** (100  $\mu\text{M}$ ) in water in presence of ADP with concentrations ranging from 0 to 28  $\mu\text{M}$ .

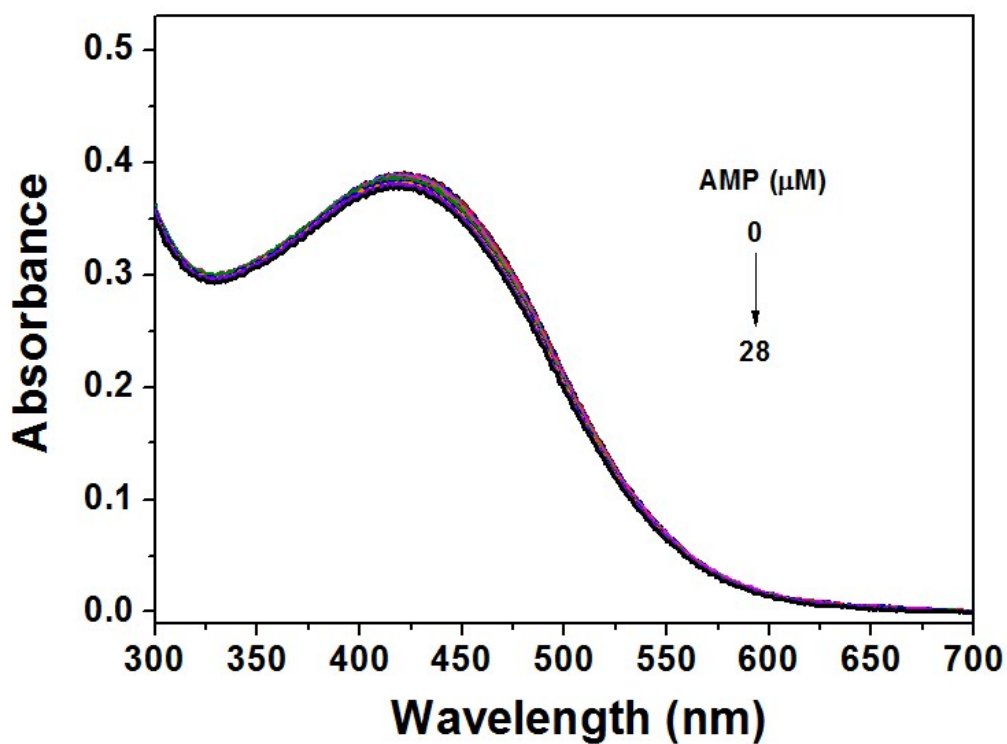

**Fig. S6:** Absorption spectra of **Cou-PT** (100  $\mu\text{M}$ ) in water in presence of AMP with concentrations ranging from 0 to 28  $\mu\text{M}$ .

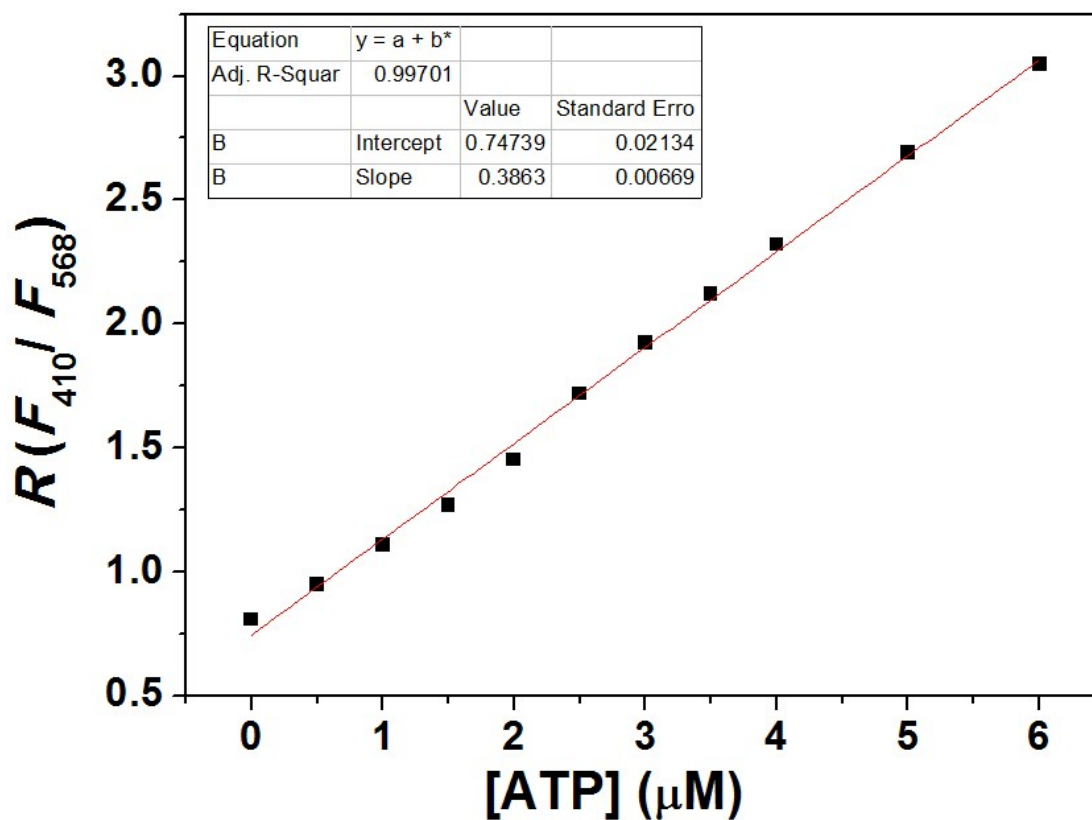

**Fig. S7:** Dependence of the emission intensity ratio  $R$  of the probe **Cou-PT** on the concentration of ATP for the determination of detection limit.
